# Supplementary material for: In silico Design of Novel Histone Deacetylase 4 Inhibitors: Design Guidelines for Improved Binding Affinity
Source: Int J Mol Sci. 2019 Dec 28;21(1):219. doi: 10.3390/ijms21010219 (PMC6981887; doi:10.3390/ijms21010219)
Supplement: Supplementary file 1 [file ijms-21-00219-s001.pdf]

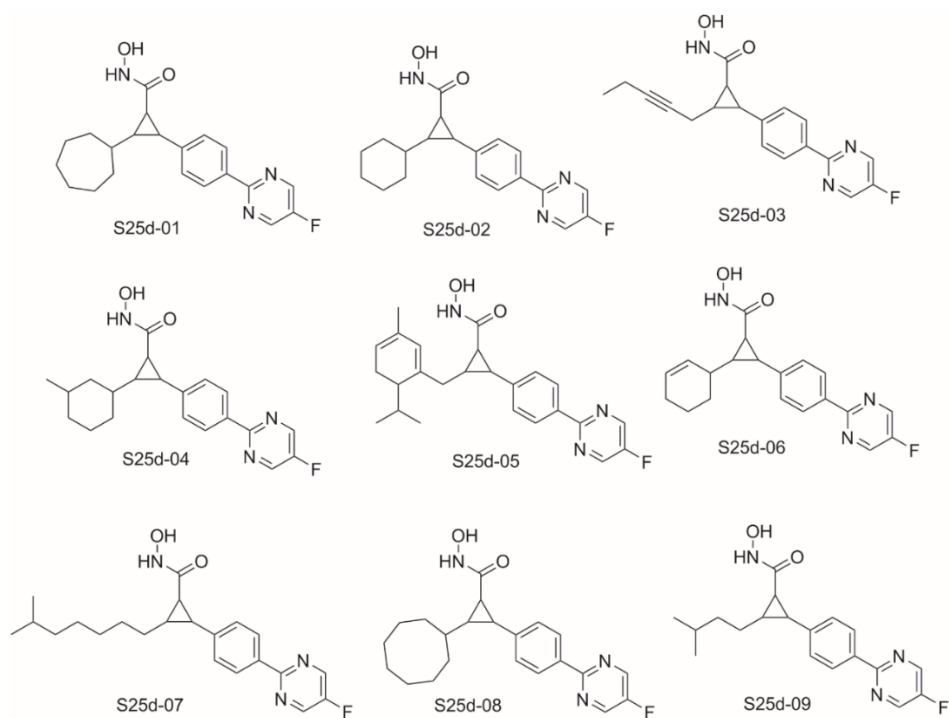

**Figure S1.** Structures of compound 25 derivatives having aliphatic moieties targeting the lower binding pocket in HDAC4.

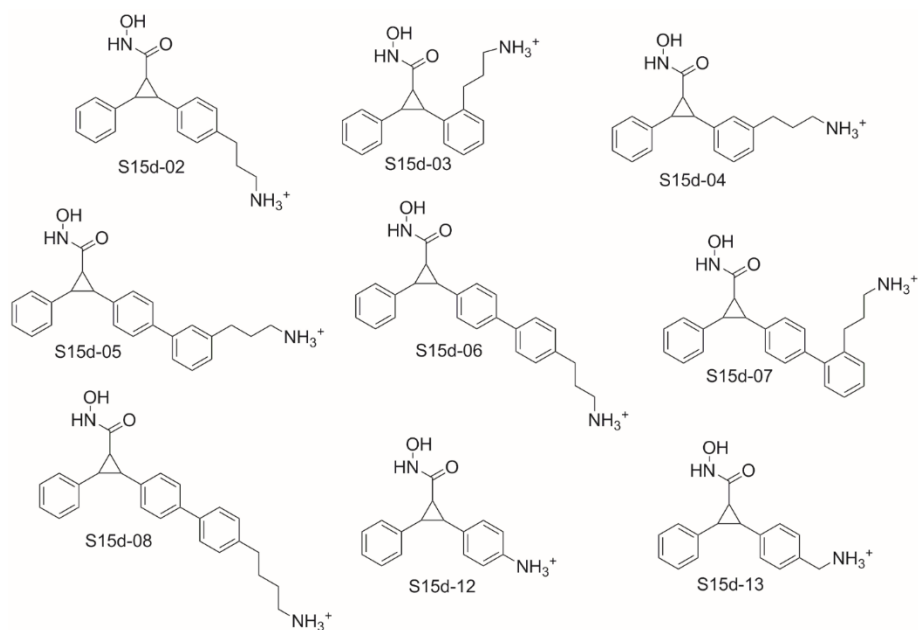

**Figure S2.** Structures of compound 15 derivatives having positively charge substituents designed to target Asp-759 in HDAC4.

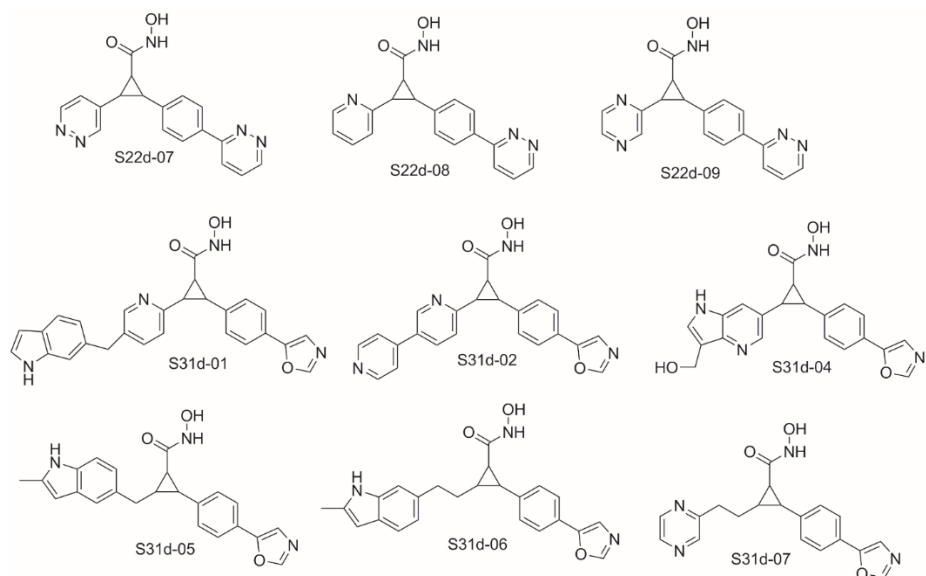

**Figure S3.** Structures of compound 31, 32, 22, and 25 derivatives having heteroatoms in the aromatic ring designed to target the lower selectivity pocket in HDAC4.

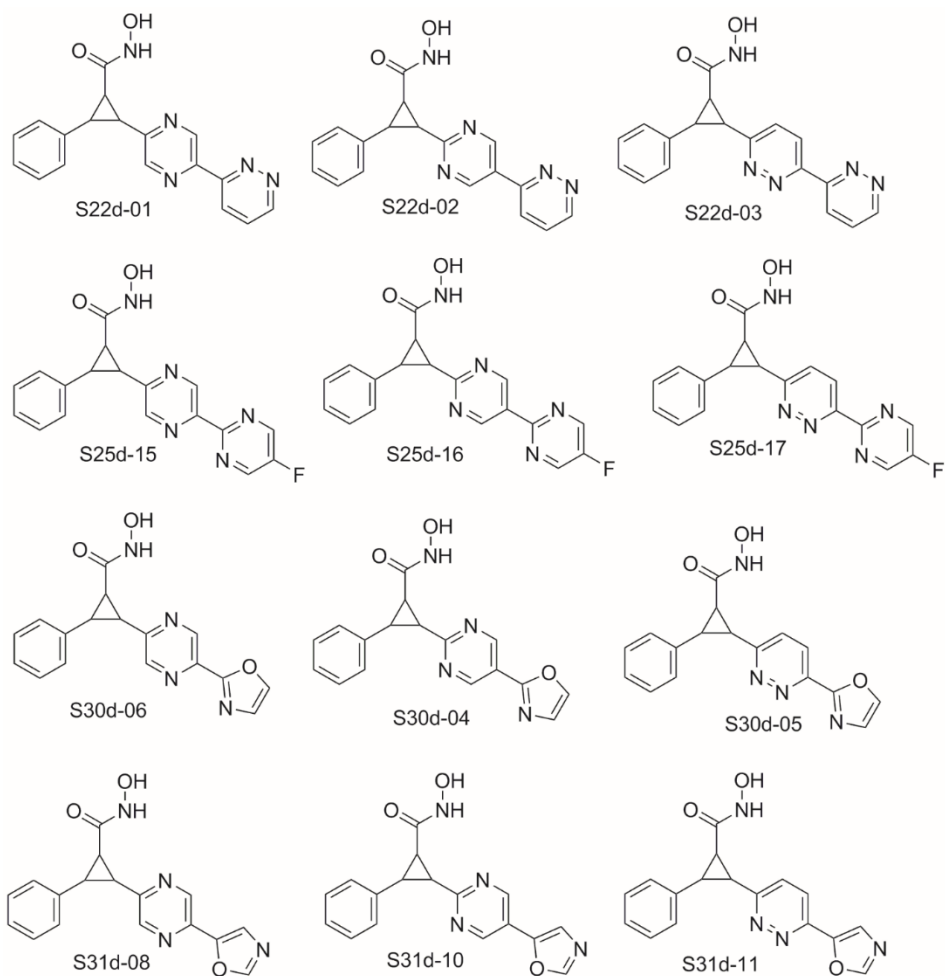

**Figure S4.** Structures of compound 31, 25, 22, and 30 derivatives having heteroatoms in the core aromatic ring designed to interact with Phe 812 and Phe 871 in HDAC4.
